# Supplementary material
Source: MDPI journal article supplement (https://www.mdpi.com/1996-1073/10/12/1972)
Supplement: s1 [file s1]

## Supplementary Information

# Experimental and One-Dimensional Mathematical Modeling of Different Operating Parameters in Direct Formic Acid Fuel Cells

Shingjiang Jessie Lue<sup>a,b,c,\*</sup>, Nai-Yuan Liu<sup>a</sup>, Selvaraj Rajesh Kumar<sup>a</sup>, Kevin Chi-Yang Tseng<sup>a</sup>, Bo-Yan Wang<sup>a</sup>, Chieh-Hsin Leung<sup>a</sup>

<sup>a</sup> Department of Chemical and Materials Engineering and Green Technology Research Center, Chang Gung University, Guishan District, Taoyuan City 333, Taiwan; nliu26@asu.edu (N.-Y.L.); rajeshkumarnst@gmail.com (S.R.K.); kevin\_cyt@hotmail.com (K.C.-Y.T.); sebsilica@gmail.com (b.-Y.W.); hsin\_1015@yahoo.com.tw (C.-H.L.)

<sup>b</sup> Department of Radiation Oncology, Chang Gung Memorial Hospital, Guishan District, Taoyuan City 333, Taiwan

<sup>c</sup> Department of Safety, Health and Environment Engineering, Ming-Chi University of Technology, Taishan, New Taipei City 243, Taiwan

\* Correspondence: jessie@mail.cgu.edu.tw; Tel.: +886-3-2118800 (ext. 5489); Fax: +886-3-2118700

The assumptions for this model are described as follows:

- (i) The full cell is under isothermal conditions.
- (ii) The reference condition is taken as ambient temperature and 1 atmospheric pressure
- (iii) The formic acid concentration in the anode catalyst layer is constant.
- (iv) The Tafel equation was used to determine the electrode kinetic reactions.
- (v) Formic acid crossover is caused by diffusion in the electrolytic membrane.
- (vi) The electro-osmosis effect on the formic acid transport rate through the membrane is negligible.
- (vii) The formic acid concentration gradient is linear with respect to the trans-membrane direction inside the membrane.
- (viii) Electrolytic membrane resistance directs the ohmic voltage drop in the cell.
- (ix) The oxygen pressure in the cathode catalyst layer is constant.
- (x) The gas hold-up volume due to carbon dioxide progress is negligible; the produced gas is immediately removed by the anode feed flow.
- (xi) The reactions at the cathode and anode are first order.
- (xii) The concentration distributions are one-dimensional and only differ with respect to the trans-membrane direction.

### Oxygen Diffusion Coefficient into the Cathode ( $D_{bc}$ )

The simplified Boltzmann equation was used to estimate the oxygen diffusion coefficient in air at the cathode [1]:

$$D_{OA} = \frac{0.00266T^{1.5}}{pM_{OA}^{0.5}\sigma_{OA}^2\Omega_D} \quad (25)$$

where  $p$  is oxygen pressure,  $T$  is temperature,  $M_{OA}$  is equivalent molar mass (defined in Eq. (27)),  $\Omega_D$  is the dimensionless diffusion collision integral as shown in Eq. (28), and  $\sigma_{OA}$  is the Lennard-Jones length (Å) and the equation is

$$\sigma_{OA} = \left( \frac{\sigma_O + \sigma_A}{2} \right) \quad (26)$$

where  $\sigma_O$  and  $\sigma_A$  data were attained from the literature [2].  $M_{OA}$  is equivalent molar mass, defined as [1]:

$$M_{OA} = 2 \left[ \left( \frac{1}{M_O} \right) + \left( \frac{1}{M_A} \right) \right]^{-1} \quad (27)$$

where  $M_A$  and  $M_O$  are the molar masses of air and oxygen, respectively. The diffusion collision integral ( $\Omega_D$ ) is calculated as [3]:

$$\Omega_D = \frac{1.06036}{(T^*)^{0.1561}} + \frac{0.193}{\exp(0.47635T^*)} + \frac{1.03587}{\exp(1.52996T^*)} + \frac{1.76474}{\exp(3.89411T^*)} \quad (28)$$

where  $T^*$  (reduced temperature) equals  $\kappa T / \varepsilon_{OA}$ ,  $\kappa$  is Boltzmann's constant and  $\varepsilon_{OA}$  is the characteristic Lennard-Jones energy shown in the following equation:

$$\varepsilon_{OA} = (\varepsilon_O \varepsilon_A)^{1/2} \quad (29)$$

where  $\varepsilon_O$  and  $\varepsilon_A$  are the Lennard-Jones energies of oxygen and air, respectively.

The effective oxygen diffusion coefficient ( $D_{OA}^{\text{eff}}$ ) in the porous gas diffusion layer was calculated as [4]:

$$D_{OA}^{\text{eff}} = \left( 1 - \left( \frac{3(1 - \theta_c)}{3 - \theta_c} \right) \right) D_{OA} \quad (30)$$

where  $\theta_c$  is the porosity of the cathode gas diffusion layer. The experimental effective diffusion coefficient of oxidant at the cathode at 90°C has been reported to be  $0.9 \times 10^{-3} \text{ cm}^2 \text{ s}^{-1}$  [5] when  $L_{bc}$  is 0.3 mm. This value was used to calculate the apparent porosity  $\theta_c$  (0.406). If the apparent porosity is recognized, the effective gas diffusion coefficient in the porous electrode can be established and used to estimate the cathode overpotential (as explained in Section 2.4).

## References

1. Reid, R. C.; Prausnitz, J.; Poling, B., The Properties of Gases and Liquids, McGraw-Hill. New York **1987**, 4.
2. Darken, L. S., Diffusion, mobility and their interrelation through free energy in binary metallic system. *Trans. Am. Inst. Mining Metall. Eng.* **1948**, 175, 184.
3. Parthasarathy, A.; Srinivasan, S.; Appleby, A. J.; Martin, C. R., Temperature dependence of the electrode kinetics of oxygen reduction at the platinum/Nafion® interface—a microelectrode investigation. *Journal of the Electrochemical Society* **1992**, 139, (9), 2530-2537.
4. Das, P. K.; Li, X.; Liu, Z.-S., Effective transport coefficients in PEM fuel cell catalyst and gas diffusion layers: beyond Bruggeman approximation. *Applied Energy* **2010**, 87, (9), 2785-2796.
5. Kulikovskiy, A., The voltage–current curve of a direct methanol fuel cell: “exact” and fitting equations. *Electrochemistry Communications* **2002**, 4, (12), 939-946.
